# Supplementary material for: Field-induced slow relaxation of magnetization in a pentacoordinate Co(ii) compound [Co(phen)(DMSO)Cl2]
Source: Royal Society of Chemistry journal article supplement (doi:10.1039/c5dt02162f), 2015-01-01
Supplement: c5dt02162f1.pdf [file c5dt02162f1.pdf]

## Electronic Supplementary Information (ESI)

### Field-induced slow relaxation of magnetization in pentacoordinate Co(II) compound [Co(phen)(DMSO)Cl<sub>2</sub>]

Ivan Nemeč<sup>a</sup>, Raphael Marx<sup>b</sup>, Radovan Herchel<sup>a</sup>, Petr Neugebauer<sup>b</sup>, Joris van Slageren<sup>b</sup> and Zdeněk Trávníček<sup>a,\*</sup>

<sup>a</sup> Regional Centre of Advanced Technologies and Materials, Department of Inorganic Chemistry, Faculty of Science, Palacký University, 17. listopadu 12, CZ-771 46 Olomouc, Czech Republic

<sup>b</sup> Institute of Physical Chemistry, University of Stuttgart, Pfaffenwaldring 55, 70569 Stuttgart, Germany.

**Table S1** Energy levels (cm<sup>-1</sup>) of ligand field multiplets in zero magnetic field derived from CASSCF/NEVPT2 calculations for **I** and for **I-V**.

|     | <b>I</b>   | <b>I</b>   | <b>II</b>  | <b>III</b> | <b>IV</b>  | <b>V</b>   |
|-----|------------|------------|------------|------------|------------|------------|
| 0:  | 0.0000     | 0.0000     | 0.0000     | 0.0000     | 0.0000     | 0.0000     |
| 1:  | 0.0000     | 0.0000     | 0.0000     | 0.0000     | 0.0000     | 0.0000     |
| 2:  | 40.1000    | 94.6257    | 232.3152   | 244.7170   | 218.9037   | 86.6385    |
| 3:  | 40.1000    | 94.6257    | 232.3152   | 244.7170   | 218.9037   | 86.6385    |
| 4:  | 1863.5883  | 1446.7049  | 731.8815   | 565.5706   | 554.5198   | 2210.0992  |
| 5:  | 1863.5883  | 1446.7049  | 731.8815   | 565.5706   | 554.5198   | 2210.0992  |
| 6:  | 2056.1053  | 1577.1244  | 1017.2286  | 870.5264   | 823.8131   | 2605.8479  |
| 7:  | 2056.1053  | 1577.1244  | 1017.2286  | 870.5264   | 823.8131   | 2605.8479  |
| 8:  | 3285.8831  | 3342.5351  | 2708.4632  | 2639.5543  | 2456.9723  | 3191.6720  |
| 9:  | 3285.8831  | 3342.5351  | 2708.4632  | 2639.5543  | 2456.9723  | 3191.6720  |
| 10: | 3533.7953  | 3427.1128  | 2767.8466  | 2704.9463  | 2501.9102  | 3453.9865  |
| 11: | 3533.7953  | 3427.1128  | 2767.8466  | 2704.9463  | 2501.9102  | 3453.9865  |
| 12: | 3891.9764  | 5895.7725  | 5079.4861  | 3863.9853  | 3951.1400  | 4736.3564  |
| 13: | 3891.9764  | 5895.7725  | 5079.4861  | 3863.9853  | 3951.1400  | 4736.3564  |
| 14: | 4076.5071  | 6002.1186  | 5186.9811  | 3996.7046  | 4073.7580  | 4787.1227  |
| 15: | 4076.5071  | 6002.1186  | 5186.9811  | 3996.7046  | 4073.7580  | 4787.1227  |
| 16: | 6104.9803  | 8525.1204  | 7238.5843  | 6953.0228  | 7339.6499  | 6028.6941  |
| 17: | 6104.9803  | 8525.1204  | 7238.5843  | 6953.0228  | 7339.6499  | 6028.6941  |
| 18: | 6194.0892  | 8587.3186  | 7312.1915  | 7030.3683  | 7405.1515  | 6083.6936  |
| 19: | 6194.0892  | 8587.3186  | 7312.1915  | 7030.3683  | 7405.1515  | 6083.6936  |
| 20: | 10258.0176 | 10284.5214 | 9205.2174  | 8363.1561  | 8473.9062  | 12357.7666 |
| 21: | 10258.0176 | 10284.5214 | 9205.2174  | 8363.1561  | 8473.9062  | 12357.7666 |
| 22: | 10431.3709 | 10351.7738 | 9312.3811  | 8486.9626  | 8599.5394  | 12624.6367 |
| 23: | 10431.3709 | 10351.7738 | 9312.3811  | 8486.9626  | 8599.5394  | 12624.6367 |
| 24: | 12047.0808 | 10619.9712 | 12225.4299 | 12107.8500 | 11826.1176 | 12907.8699 |
| 25: | 12047.0808 | 10619.9712 | 12225.4299 | 12107.8500 | 11826.1176 | 12907.8699 |
| 26: | 12143.6103 | 15248.8101 | 13420.3546 | 12132.1577 | 12807.4835 | 13551.8622 |
| 27: | 12143.6103 | 15248.8101 | 13420.3546 | 12132.1577 | 12807.4835 | 13551.8622 |
| 28: | 13266.1283 | 15381.1965 | 13441.4726 | 12765.8144 | 12825.4142 | 13816.4989 |
| 29: | 13266.1283 | 15381.1965 | 13441.4726 | 12765.8144 | 12825.4142 | 13816.4989 |
| 30: | 14942.8712 | 15538.0319 | 15245.8550 | 16128.3654 | 15774.4563 | 13911.5961 |
| 31: | 14942.8712 | 15538.0319 | 15245.8550 | 16128.3654 | 15774.4563 | 13911.5961 |
| 32: | 17973.8348 | 16046.2701 | 16387.9994 | 16428.8554 | 16354.0567 | 17268.1753 |
| 33: | 17973.8348 | 16046.2701 | 16387.9994 | 16428.8554 | 16354.0568 | 17268.1753 |
| 34: | 18746.4925 | 17281.8455 | 17901.2192 | 17357.4736 | 16762.0801 | 18117.3405 |
| 35: | 18746.4925 | 17281.8455 | 17901.2192 | 17357.4736 | 16762.0801 | 18117.3405 |
| 36: | 19103.3554 | 18770.5617 | 18518.8776 | 18588.3686 | 18759.3075 | 19922.9373 |

|     |            |            |            |            |            |            |
|-----|------------|------------|------------|------------|------------|------------|
| 37: | 19103.3554 | 18770.5617 | 18518.8776 | 18588.3686 | 18759.3075 | 19922.9373 |
| 38: | 19181.6812 | 18957.4187 | 18955.8276 | 18856.7015 | 18978.1542 | 20237.4933 |
| 39: | 19181.6812 | 18957.4187 | 18955.8276 | 18856.7015 | 18978.1542 | 20237.4933 |
| 40: | 19318.1268 | 19017.5112 | 19026.3169 | 18907.1894 | 19023.5492 | 20283.6844 |
| 41: | 19318.1268 | 19017.5112 | 19026.3169 | 18907.1894 | 19023.5492 | 20283.6844 |
| 42: | 19919.6126 | 19847.7576 | 19293.5626 | 19200.6261 | 19086.7931 | 20325.4219 |
| 43: | 19919.6127 | 19847.7576 | 19293.5626 | 19200.6261 | 19086.7931 | 20325.4219 |
| 44: | 20180.6591 | 19989.4795 | 20020.0887 | 19674.0870 | 19599.3263 | 20423.4207 |
| 45: | 20180.6591 | 19989.4795 | 20020.0887 | 19674.0870 | 19599.3263 | 20423.4207 |
| 46: | 20651.8750 | 20817.1265 | 20407.7489 | 20080.2220 | 19987.0585 | 20608.5882 |
| 47: | 20651.8750 | 20817.1265 | 20407.7489 | 20080.2220 | 19987.0585 | 20608.5882 |
| 48: | 20900.4766 | 22183.8439 | 21041.8889 | 20182.2744 | 20100.6273 | 20702.6932 |
| 49: | 20900.4766 | 22183.8439 | 21041.8889 | 20182.2744 | 20100.6273 | 20702.6932 |
| 50: | 21015.3030 | 22706.6200 | 21189.1678 | 20252.6416 | 20164.0252 | 20820.7667 |
| 51: | 21015.3030 | 22706.6200 | 21189.1678 | 20252.6416 | 20164.0252 | 20820.7667 |
| 52: | 21408.6226 | 22774.4261 | 21449.0664 | 21295.0501 | 21489.1952 | 20986.3203 |
| 53: | 21408.6226 | 22774.4261 | 21449.0664 | 21295.0501 | 21489.1952 | 20986.3203 |
| 54: | 21716.6788 | 23016.9177 | 22100.3906 | 21635.5917 | 21852.3371 | 21550.9860 |
| 55: | 21716.6788 | 23016.9177 | 22100.3906 | 21635.5917 | 21852.3371 | 21550.9860 |
| 56: | 22396.5927 | 23290.0882 | 22426.3940 | 21752.2642 | 22339.0184 | 22196.1350 |
| 57: | 22396.5927 | 23290.0882 | 22426.3940 | 21752.2642 | 22339.0184 | 22196.1350 |
| 58: | 22631.6899 | 23933.2437 | 22520.8174 | 22114.1675 | 22748.7332 | 23125.7592 |
| 59: | 22631.6899 | 23933.2437 | 22520.8174 | 22114.1675 | 22748.7332 | 23125.7592 |
| 60: | 23111.8373 | 24902.2392 | 22889.8247 | 22526.1477 | 22836.5213 | 23180.4090 |
| 61: | 23111.8373 | 24902.2392 | 22889.8247 | 22526.1477 | 22836.5213 | 23180.4090 |
| 62: | 23474.3364 | 24977.9465 | 23498.7678 | 23348.3214 | 23136.9212 | 23514.3099 |
| 63: | 23474.3364 | 24977.9465 | 23498.7678 | 23348.3214 | 23136.9212 | 23514.3099 |
| 64: | 26011.9515 | 27082.7253 | 26271.2874 | 25500.5097 | 25626.6623 | 26082.8444 |
| 65: | 26011.9515 | 27082.7253 | 26271.2874 | 25500.5097 | 25626.6623 | 26082.8444 |
| 66: | 26130.4942 | 27380.8644 | 26424.1660 | 26258.2709 | 26496.9580 | 26186.3060 |
| 67: | 26130.4942 | 27380.8644 | 26424.1660 | 26258.2709 | 26496.9580 | 26186.3060 |
| 68: | 27955.3578 | 27905.8186 | 26933.0992 | 26662.9157 | 26849.6921 | 28931.5429 |
| 69: | 27955.3578 | 27905.8186 | 26933.0992 | 26662.9157 | 26849.6921 | 28931.5429 |
| 70: | 28529.2523 | 28637.7509 | 27653.3554 | 26939.3578 | 27202.2260 | 29438.6020 |
| 71: | 28529.2523 | 28637.7509 | 27653.3554 | 26939.3578 | 27202.2260 | 29438.6020 |
| 72: | 28847.9087 | 29605.3775 | 28387.8174 | 28041.9865 | 28441.1912 | 29687.6176 |
| 73: | 28847.9087 | 29605.3775 | 28387.8174 | 28041.9865 | 28441.1912 | 29687.6176 |
| 74: | 29318.9081 | 30440.7472 | 29132.2959 | 28495.4962 | 28794.0685 | 30528.5831 |
| 75: | 29318.9081 | 30440.7472 | 29132.2959 | 28495.4962 | 28794.0685 | 30528.5831 |
| 76: | 29620.6820 | 30757.1334 | 29603.2055 | 28862.3526 | 29320.9711 | 30839.8890 |
| 77: | 29620.6820 | 30757.1334 | 29603.2055 | 28862.3526 | 29320.9711 | 30839.8890 |
| 78: | 30100.2587 | 31202.5757 | 29951.7160 | 29361.5424 | 29789.7357 | 31166.0331 |
| 79: | 30100.2587 | 31202.5757 | 29951.7160 | 29361.5424 | 29789.7357 | 31166.0331 |
| 80: | 30389.4554 | 31431.4416 | 30280.1527 | 29615.9396 | 30190.4195 | 31490.0925 |
| 81: | 30389.4554 | 31431.4416 | 30280.1527 | 29615.9396 | 30190.4195 | 31490.0925 |
| 82: | 30696.1492 | 31721.6542 | 30696.4942 | 29816.9491 | 30418.6470 | 31825.7400 |
| 83: | 30696.1492 | 31721.6542 | 30696.4942 | 29816.9491 | 30418.6470 | 31825.7400 |
| 84: | 31026.5998 | 33048.2030 | 31459.9264 | 30873.4314 | 31302.6394 | 32095.4441 |
| 85: | 31026.5998 | 33048.2030 | 31459.9264 | 30873.4314 | 31302.6394 | 32095.4441 |
| 86: | 31542.1220 | 33318.2574 | 32042.9158 | 31170.5998 | 31766.5375 | 32767.4625 |
| 87: | 31542.1220 | 33318.2574 | 32042.9158 | 31170.5998 | 31766.5375 | 32767.4625 |
| 88: | 31766.4670 | 33864.7223 | 32510.7306 | 31464.0705 | 31995.3612 | 32989.6106 |
| 89: | 31766.4670 | 33864.7223 | 32510.7306 | 31464.0705 | 31995.3612 | 32989.6106 |
| 90: | 31999.1779 | 35458.6036 | 33123.1770 | 31859.8631 | 32195.0526 | 33263.4633 |
| 91: | 31999.1779 | 35458.6036 | 33123.1770 | 31859.8631 | 32195.0526 | 33263.4633 |
| 92: | 33155.3284 | 35915.7383 | 33612.0130 | 32189.1400 | 32668.5751 | 34382.7085 |
| 93: | 33155.3284 | 35915.7383 | 33612.0130 | 32189.1400 | 32668.5751 | 34382.7085 |
| 94: | 33761.9308 | 36418.3804 | 34059.8170 | 32871.8550 | 33405.2883 | 35208.5098 |
| 95: | 33761.9308 | 36418.3804 | 34059.8170 | 32871.8550 | 33405.2883 | 35208.5098 |
| 96: | 40703.4924 | 41092.4704 | 40005.9140 | 39782.4147 | 39917.8558 | 40979.7470 |

|      |            |            |            |            |            |            |
|------|------------|------------|------------|------------|------------|------------|
| 97:  | 40703.4924 | 41092.4704 | 40005.9140 | 39782.4147 | 39917.8558 | 40979.7470 |
| 98:  | 41217.1399 | 41783.9820 | 40660.4456 | 40399.5246 | 40655.7640 | 41123.0795 |
| 99:  | 41217.1399 | 41783.9820 | 40660.4456 | 40399.5246 | 40655.7640 | 41123.0795 |
| 100: | 41469.2004 | 42281.3859 | 41544.4762 | 41100.7158 | 41215.3186 | 42484.0850 |
| 101: | 41469.2004 | 42281.3859 | 41544.4762 | 41100.7158 | 41215.3186 | 42484.0850 |
| 102: | 42598.9899 | 44133.9536 | 42142.3669 | 41712.2102 | 42259.3006 | 42658.4884 |
| 103: | 42598.9899 | 44133.9536 | 42142.3669 | 41712.2102 | 42259.3006 | 42658.4884 |
| 104: | 42891.2691 | 44319.4022 | 42421.5006 | 41901.2332 | 42443.0724 | 42883.4304 |
| 105: | 42891.2691 | 44319.4022 | 42421.5006 | 41901.2332 | 42443.0724 | 42883.4304 |
| 106: | 43115.8128 | 44871.3467 | 43038.2428 | 42240.3537 | 42788.3777 | 43057.6601 |
| 107: | 43115.8128 | 44871.3467 | 43038.2428 | 42240.3537 | 42788.3777 | 43057.6601 |
| 108: | 43489.7744 | 45017.2275 | 43142.4921 | 42601.0392 | 43066.1107 | 43532.4060 |
| 109: | 43489.7744 | 45017.2275 | 43142.4921 | 42601.0392 | 43066.1107 | 43532.4060 |
| 110: | 61058.3099 | 60759.5505 | 60405.1309 | 60128.5845 | 60365.1798 | 61169.4200 |
| 111: | 61058.3099 | 60759.5505 | 60405.1309 | 60128.5845 | 60365.1798 | 61169.4200 |
| 112: | 61390.0357 | 61854.7912 | 60663.4620 | 60414.5437 | 60563.0277 | 61530.5179 |
| 113: | 61390.0357 | 61854.7912 | 60663.4620 | 60414.5437 | 60563.0277 | 61530.5179 |
| 114: | 62665.5920 | 63602.0749 | 62119.1714 | 61682.8617 | 62240.0003 | 63393.1159 |
| 115: | 62665.5920 | 63602.0749 | 62119.1714 | 61682.8617 | 62240.0003 | 63393.1159 |
| 116: | 63951.5734 | 65608.0704 | 63504.9284 | 62632.1377 | 63020.0850 | 63648.2579 |
| 117: | 63951.5734 | 65608.0704 | 63504.9284 | 62632.1377 | 63020.0850 | 63648.2580 |
| 118: | 64284.6638 | 66432.6372 | 64269.6899 | 63358.5766 | 64108.0696 | 64203.2338 |
| 119: | 64284.6638 | 66432.6372 | 64269.6899 | 63358.5766 | 64108.0696 | 64203.2338 |

**Table S2.** Individual contributions to  $D$ -tensor for **1** calculated by CASSCF/NEVPT2.

| Multiplicity | Root | $D$     | $E$    |
|--------------|------|---------|--------|
| 4            | 0    | 0.000   | 0.000  |
| 4            | 1    | -21.647 | -3.526 |
| 4            | 2    | -0.019  | -0.211 |
| 4            | 3    | -5.303  | -8.866 |
| 4            | 4    | 7.957   | 6.140  |
| 4            | 5    | -0.189  | -0.113 |
| 4            | 6    | 0.340   | 0.244  |
| 4            | 7    | 0.001   | -0.000 |
| 4            | 8    | 0.047   | 0.015  |
| 4            | 9    | -0.045  | -0.012 |
| 2            | 0    | -0.153  | 0.375  |
| 2            | 1    | 0.554   | 0.055  |
| 2            | 2    | -0.292  | -0.183 |
| 2            | 3    | 0.410   | 0.266  |
| 2            | 4    | 0.073   | -0.001 |
| 2            | 5    | 0.100   | 0.047  |
| 2            | 6    | 3.647   | 0.004  |
| 2            | 7    | -1.710  | 1.620  |
| 2            | 8    | -2.591  | -1.886 |
| 2            | 9    | -0.015  | -0.007 |
| 2            | 10   | 0.003   | 0.019  |
| 2            | 11   | 0.003   | 0.003  |
| 2            | 12   | -0.008  | -0.006 |
| 2            | 13   | 0.034   | 0.020  |
| 2            | 14   | 0.240   | 0.008  |
| 2            | 15   | -0.023  | 0.122  |
| 2            | 16   | 0.112   | 0.083  |
| 2            | 17   | 0.066   | 0.002  |
| 2            | 18   | -0.001  | 0.002  |
| 2            | 19   | 0.030   | -0.003 |
| 2            | 20   | -0.204  | -0.247 |
| 2            | 21   | -0.063  | -0.081 |
| 2            | 22   | -0.546  | -0.547 |
| 2            | 23   | -0.188  | 0.046  |
| 2            | 24   | -0.550  | 0.397  |
| 2            | 25   | 0.687   | -0.001 |
| 2            | 26   | 0.032   | 0.042  |
| 2            | 27   | -0.037  | -0.075 |
| 2            | 28   | 0.143   | 0.070  |
| 2            | 29   | 0.116   | -0.009 |
| 2            | 30   | -0.037  | 0.026  |
| 2            | 31   | -0.073  | -0.055 |
| 2            | 32   | -0.011  | 0.015  |
| 2            | 33   | -0.008  | 0.004  |
| 2            | 34   | 0.001   | 0.004  |
| 2            | 35   | 0.001   | 0.000  |
| 2            | 36   | -0.036  | -0.022 |
| 2            | 37   | -0.007  | 0.010  |
| 2            | 38   | 0.012   | 0.002  |
| 2            | 39   | 0.014   | 0.008  |

**Table S3.** Individual contributions to  $D$ -tensor for **I-V** calculated by CASSCF/NEVPT2.

| Multiplicity | Root | I       |         | II       |        | III      |        | IV       |         | V      |         |
|--------------|------|---------|---------|----------|--------|----------|--------|----------|---------|--------|---------|
|              |      | $D$     | $E$     | $D$      | $E$    | $D$      | $E$    | $D$      | $E$     | $D$    | $E$     |
| 4            | 0    | -0.000  | -0.000  | -0.000   | -0.000 | 0.000    | -0.000 | 0.000    | -0.000  | 0.000  | -0.000  |
| 4            | 1    | -65.702 | 0.093   | -113.846 | -0.131 | -123.541 | -0.267 | -128.718 | -0.077  | 9.009  | 9.009   |
| 4            | 2    | 10.128  | -10.123 | 2.132    | -3.223 | -0.203   | -1.171 | 18.705   | -15.975 | -0.042 | -0.136  |
| 4            | 3    | 3.032   | -3.019  | -9.905   | -4.074 | -11.920  | -5.665 | 0.371    | 2.422   | 13.570 | 13.570  |
| 4            | 4    | 5.194   | 5.864   | 3.595    | -6.822 | 2.760    | -6.677 | 1.314    | 1.967   | 13.050 | -13.056 |
| 4            | 5    | 1.308   | -1.312  | 0.017    | 0.017  | 0.078    | -0.087 | 4.981    | 2.850   | -0.015 | -0.000  |
| 4            | 6    | 0.159   | 0.198   | 0.017    | 0.017  | 0.082    | -0.009 | 0.211    | 0.034   | 0.005  | 0.005   |
| 4            | 7    | 0.004   | -0.004  | 0.089    | -0.097 | 0.076    | -0.092 | 0.021    | 0.014   | 0.012  | 0.012   |
| 4            | 8    | 0.009   | 0.037   | 0.000    | 0.000  | -0.001   | -0.001 | -0.003   | 0.012   | 0.146  | -0.147  |
| 4            | 9    | 0.035   | -0.035  | -0.090   | -0.003 | -0.066   | -0.008 | -0.004   | -0.017  | 0.094  | 0.094   |
| 2            | 0    | 0.694   | -1.378  | -1.211   | -1.211 | -1.034   | -1.038 | 2.214    | 0.498   | -0.000 | -0.000  |
| 2            | 1    | -0.217  | 0.226   | -2.322   | -2.322 | -0.071   | -0.163 | 0.731    | -0.041  | 0.514  | 0.008   |
| 2            | 2    | 1.486   | -0.135  | -0.179   | -0.179 | -1.695   | -1.744 | 0.036    | -0.040  | 2.960  | 0.000   |
| 2            | 3    | 1.781   | -0.048  | 0.269    | 0.022  | 0.274    | 0.058  | 0.574    | 0.579   | -0.000 | -0.000  |
| 2            | 4    | -0.115  | 0.116   | -0.000   | -0.000 | 0.009    | 0.000  | 0.317    | 0.123   | -0.513 | -0.513  |
| 2            | 5    | -0.030  | 0.032   | 3.114    | 0.004  | 3.225    | 0.018  | 2.325    | -0.119  | -1.197 | -1.197  |
| 2            | 6    | 1.847   | -0.142  | -0.075   | 0.170  | -0.171   | 0.124  | -0.267   | 0.002   | -0.213 | 0.214   |
| 2            | 7    | -1.626  | 1.619   | -1.032   | 1.087  | -1.247   | 1.272  | -1.414   | 1.446   | -0.721 | 1.223   |
| 2            | 8    | -0.091  | -0.955  | -2.654   | -2.654 | -2.588   | -2.586 | -1.027   | -1.242  | 8.750  | 0.080   |
| 2            | 9    | -0.370  | -0.370  | -0.019   | -0.019 | 0.033    | 0.002  | -0.011   | 0.089   | 0.016  | 0.002   |
| 2            | 10   | -0.280  | 0.282   | 0.058    | 0.004  | 0.029    | -0.012 | -0.124   | 0.046   | -0.002 | -0.002  |
| 2            | 11   | -0.039  | 0.039   | 0.001    | 0.017  | -0.026   | 0.030  | -0.025   | 0.025   | -0.001 | -0.001  |
| 2            | 12   | -0.158  | 0.157   | -0.215   | 0.215  | -0.072   | 0.077  | -0.024   | 0.007   | -0.051 | 0.051   |
| 2            | 13   | 0.431   | 0.000   | 0.295    | 0.063  | 0.149    | 0.009  | -0.008   | 0.078   | -0.018 | -0.018  |
| 2            | 14   | -0.278  | 0.279   | -0.184   | 0.211  | -0.081   | -0.028 | 0.102    | -0.007  | -0.118 | 0.127   |
| 2            | 15   | -0.089  | 0.088   | -0.050   | -0.050 | -0.093   | 0.113  | -0.188   | 0.007   | -0.110 | -0.110  |
| 2            | 16   | -0.014  | -0.014  | 0.029    | 0.000  | -0.134   | -0.272 | 0.257    | 0.173   | -0.055 | 0.095   |
| 2            | 17   | 0.143   | -0.145  | -0.085   | -0.085 | -0.145   | -0.094 | 0.252    | -0.076  | -0.001 | -0.001  |
| 2            | 18   | -0.138  | 0.134   | -0.410   | -0.410 | 0.009    | -0.021 | -0.028   | 0.010   | 0.010  | 0.049   |
| 2            | 19   | 0.274   | -0.339  | -0.002   | -0.002 | -0.008   | 0.002  | -0.013   | -0.071  | -0.034 | -0.034  |
| 2            | 20   | -0.382  | 0.377   | -0.137   | 0.152  | -0.061   | 0.057  | -1.192   | -0.057  | 0.125  | 0.035   |
| 2            | 21   | -1.004  | -0.998  | -0.560   | -0.560 | -0.745   | -0.615 | -0.151   | 0.139   | -0.062 | -0.062  |
| 2            | 22   | -0.013  | 0.012   | 0.327    | 0.000  | 0.168    | 0.002  | -0.053   | -0.043  | 1.058  | 0.000   |
| 2            | 23   | 0.390   | -0.003  | -0.001   | -0.001 | -0.004   | 0.039  | 0.383    | 0.016   | -0.007 | -0.007  |
| 2            | 24   | -0.056  | 0.056   | -0.757   | 0.855  | -0.053   | 0.028  | 0.380    | -0.160  | -0.003 | -0.003  |

|   |    |        |        |        |        |        |        |        |        |        |        |
|---|----|--------|--------|--------|--------|--------|--------|--------|--------|--------|--------|
| 2 | 25 | 0.019  | -0.034 | -0.001 | -0.001 | -0.008 | 0.583  | -0.024 | -0.040 | 0.013  | 0.074  |
| 2 | 26 | -0.006 | 0.006  | -0.044 | -0.044 | -0.043 | 0.294  | -0.076 | -0.119 | -0.706 | 0.706  |
| 2 | 27 | 0.051  | 0.000  | 0.565  | 0.021  | -0.077 | -0.077 | -0.042 | -0.065 | -0.480 | -0.480 |
| 2 | 28 | -0.144 | 0.144  | -0.045 | 0.073  | 0.105  | 0.042  | -0.096 | 0.025  | -0.137 | 0.138  |
| 2 | 29 | -0.013 | 0.013  | 0.273  | 0.007  | 0.147  | 0.049  | 0.004  | -0.024 | -0.226 | -0.226 |
| 2 | 30 | -0.056 | -0.111 | -0.002 | -0.002 | 0.007  | 0.000  | 0.096  | -0.037 | -0.011 | -0.011 |
| 2 | 31 | 0.132  | -0.008 | 0.195  | 0.001  | 0.159  | -0.002 | 0.007  | 0.011  | -0.071 | 0.072  |
| 2 | 32 | 0.034  | 0.005  | -0.003 | -0.003 | -0.006 | 0.014  | 0.001  | -0.033 | -0.042 | -0.042 |
| 2 | 33 | -0.015 | 0.016  | -0.070 | 0.087  | -0.073 | 0.077  | -0.023 | 0.024  | 0.004  | 0.004  |
| 2 | 34 | 0.005  | -0.003 | -0.003 | -0.003 | -0.001 | -0.003 | 0.012  | 0.000  | -0.001 | -0.001 |
| 2 | 35 | 0.036  | -0.005 | -0.031 | -0.031 | -0.004 | -0.006 | 0.009  | 0.011  | 0.087  | 0.000  |
| 2 | 36 | 0.000  | 0.000  | 0.004  | 0.000  | -0.029 | -0.025 | 0.001  | -0.000 | -0.001 | -0.001 |
| 2 | 37 | 0.013  | -0.005 | -0.000 | -0.000 | 0.004  | -0.000 | 0.015  | 0.002  | 0.026  | 0.003  |
| 2 | 38 | -0.012 | 0.012  | -0.006 | 0.007  | -0.009 | -0.000 | -0.008 | -0.002 | -0.000 | -0.000 |
| 2 | 39 | 0.005  | -0.019 | -0.062 | -0.062 | -0.043 | -0.042 | 0.033  | 0.012  | 0.066  | 0.001  |

**Table S4.** Parameters of one-component Debye model for **1** derived according Eq.8 in main text.

| $T/K$ | $\chi_S/(10^{-6} \text{ m}^3\text{mol}^{-1})$ | $\chi_T/(10^{-6} \text{ m}^3\text{mol}^{-1})$ | $\alpha$ | $\tau/(10^{-6} \text{ s})$ |
|-------|-----------------------------------------------|-----------------------------------------------|----------|----------------------------|
| 1.9   | 6.030                                         | 9.109                                         | 0.359    | 0.8878                     |
| 2.2   | 5.375                                         | 8.100                                         | 0.343    | 0.6204                     |
| 2.5   | 4.730                                         | 7.327                                         | 0.304    | 0.3797                     |
| 2.8   | 4.182                                         | 6.703                                         | 0.300    | 0.2245                     |

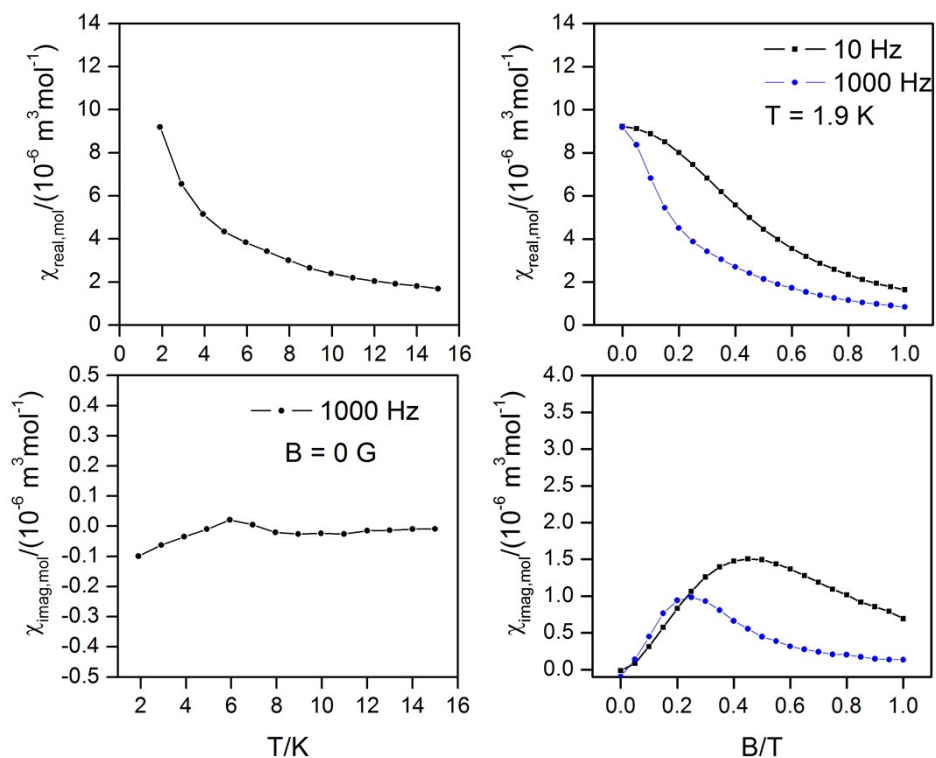

**Fig S1** In-phase  $\chi_{\text{real}}$  and out-of-phase  $\chi_{\text{imag}}$  molar susceptibilities for **1** at zero static magnetic field (left) and in non-zero static field (right). Lines serve as guides for the eyes.

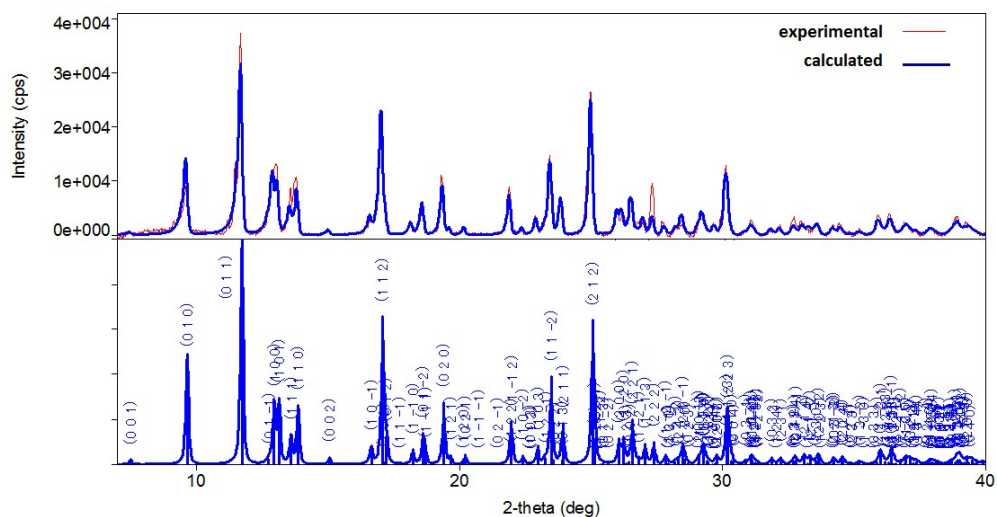

**Fig S2** Powder diffraction pattern for **1**. Experimental data are shown as a red line, while calculated ones as a blue line.



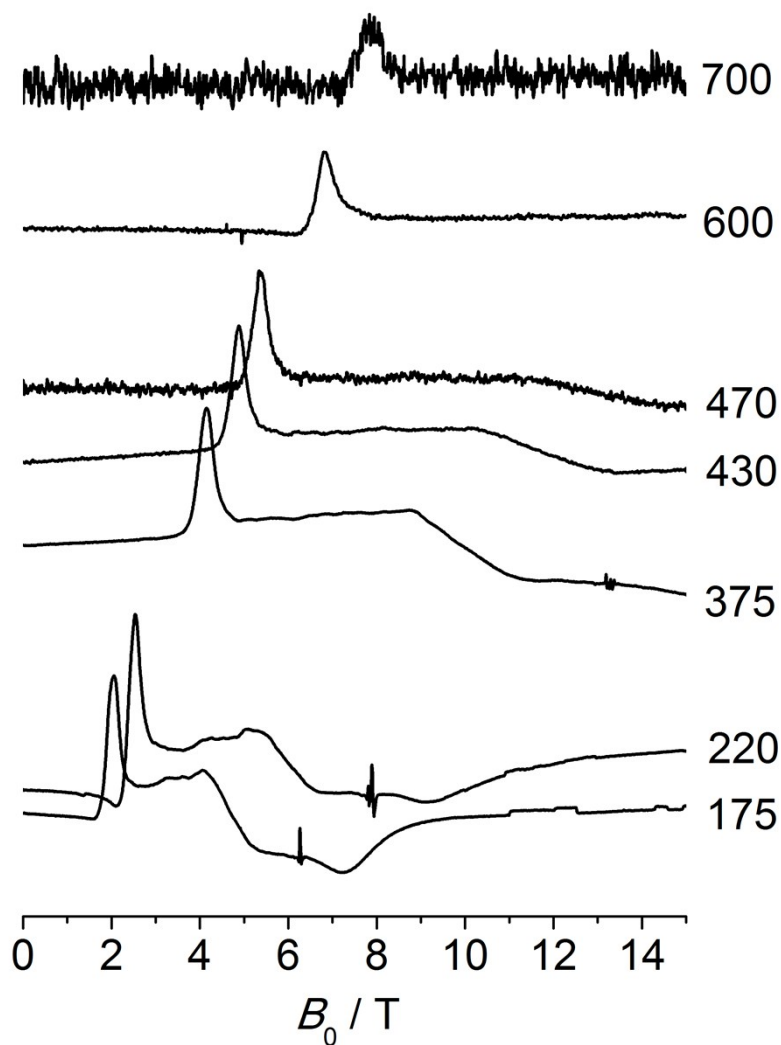

Fig S3 HFEPR spectra recorded on pressed powder pellets of **1** at 5 K and different frequencies as indicated.
